# Supplementary material
Source: publisher site journal article supplement (https://www.dovepress.com/article/404367)
Supplement: Supplementary file 1 [file get_supplementary_file.php]

| **Supplementary Table 1: Tests of Normality** | | | | | | |
| --- | --- | --- | --- | --- | --- | --- |
|  | Kolmogorov-Smirnova | | | Shapiro-Wilk | | |
| Statistic | df | Sig. | Statistic | df | Sig. |
| Awarness Score | .294 | 65 | .000 | .718 | 65 | .000 |
| Attitude score | .111 | 65 | .046 | .973 | 65 | .160 |
| Readiness score | .116 | 65 | .030 | .969 | 65 | .098 |
| Total score | .082 | 65 | .200* | .988 | 65 | .766 |
| *. This is a lower bound of the true significance. | | | | | | |
| a. Lilliefors Significance Correction | | | | | | |
